# Supplementary material
Source: publisher figshare collection journal article supplement (https://karger.figshare.com/articles/dataset/_/7270961)
Supplement: Supplementary file 1 [file 1]

**Movie Captions**

Movie S0

This movie shows the pronotum grasp and rapid positioning of the wasp’s stinger at the thorax for sting 1. It was filmed at 1000 fames per second, thus time can be measured as 1 ms per frame. The movie lasts 790 milliseconds (0.79 seconds).

Movie S1

This movie shows multiple examples of defensive kicking. It was filmed at 1000 fames per second, thus time can be measured as 1 ms per frame. Note that for some interactions, the cockroach has climbed onto the upper, clear surface of the container (e.g. clips 3 and 9).

Movie S2

This movie shows multiple examples of escape responses triggered by contact. Clips 1-5 show escape triggered by contact prior to pronotum grasp. Clips 6-11 show escape trigged by the pronotum grasp. It was filmed at 1000 fames per second, thus time can be measured as 1 ms per frame.

Movie S3

This movie shows show multiple examples of cockroaches removing grasping wasps by raking with the tibial spines. It was filmed at 1000 fames per second, thus time can be measured as 1 ms per frame.

Movie S4

This movie shows several examples of the cockroach holding back the stinger with its spiny limbs. It was filmed at 1000 fames per second, thus time can be measured as 1 ms per frame.

Movie S5

This movie shows examples of the tibial spines lodging between segments of the wasp’s cutical and examples of cockroaches biting at the wasp.

Movie S6

This real-time movie shows defenseless cockroaches being rapidly subdued by wasps.

Movie S7

This real-time movie shows cockroaches defending themselves by stilt-standing and kicking at the wasp.

Movie S8

This real-time movie shows an aggressive wasp that overcomes the cockroach by circling to attack on the far side of the defense.
